# Supplementary material for: Study of the Chain Condensation Process from a Dilute to a Concentrated Solution and the Transformation of the Chain Conformation from a Solution to a Film for the Conjugated Polymer PFO
Source: PubMed Central journal article supplement — ACS Omega. 2022 Mar 2;7(10):8498–505. doi: 10.1021/acsomega.1c06144 (PMC8928514; doi:10.1021/acsomega.1c06144), 2022-03-02
Supplement: ao1c06144_si_001.pdf [file ao1c06144_si_001.pdf]

## Supporting Information

# Study of Chains Condensed Process from Dilute to Concentrated Solution and Chains Conformation's Transformation from Solution to Film for the Conjugated Polymer PFO

*Dong Lei, Yanan Guo, and Dan Lu\**

State Key Laboratory of Supramolecular Structure and Materials, College of Chemistry, Jilin University, 2699 Qianjin Avenue, Changchun, 130012, China

\*

## APPENDIX:

### 1.1 Calculation of the Kuhn length ( $b$ ) and Kuhn segments ( $N$ )

Firstly,  $R_{\max}$  is the contour length of the PFO chain,  $R$  is the Kuhn chain length. According to the previous report, the length of the monomer unit was  $l = 0.838$  nm to the PFO chain, molar mass of the monomer was  $M_0 = 390$  g mol<sup>-1</sup>. Therefore,  $R_{\max}$  can be calculated as follow:  $R_{\max} = \frac{M}{M_0} \times l = \frac{127192 \text{ g mol}^{-1}}{390 \text{ g mol}^{-1}} \times 0.838 \text{ nm} = 273 \text{ nm}$ .

Then, according to the equation (9) in the main text, the Kuhn segments ( $N$ ) can be calculated as follow:  $N = \frac{R_{\max}^2}{R^2} = \frac{273^2}{41.4^2} = 44$ .

Finally, according to the equation (10) in the main text, the Kuhn length ( $b$ ) can be calculated as follow:  $b = \frac{R^2}{R_{\max}} = \frac{41.4^2}{273} = 6.28 \text{ nm}$

### 1.2 Calculation of the Kuhn unit relaxation time ( $\tau_0$ ) and Polymer chain relaxation time ( $\tau_Z$ ( $\tau_R$ ))

Firstly,  $\tau_0 \approx \eta_s b^3 / kT$  is Kuhn unit relaxation time,  $k = 1.38 \times 10^{-23}$  J K<sup>-1</sup> is the Boltzmann constant,  $T = 298.15$  K is the temperature. In addition,  $\eta_s = 4.31 \times 10^{-4}$  (pa·s) is obtained from Figure 1 and  $b = 6.14$  nm is obtained from equation (10) in the main text. Based on the above information, the Kuhn unit relaxation time ( $\tau_0$ ) is calculated as follows:

$$\begin{aligned} \tau_0 &= \frac{(4.31 \times 10^{-4} \text{ pa} \cdot \text{s}) \times (6.28 \text{ nm})^3}{(1.38 \times 10^{-23} \text{ J} \cdot \text{K}^{-1}) \times (298.15 \text{ K})} = \frac{(4.31 \times 10^{-4} \text{ kg} \cdot \text{m}^{-1} \cdot \text{s}^{-1}) \times (6.28 \times 10^{-9} \text{ m})^3}{(1.38 \times 10^{-23} \text{ kg} \cdot \text{m}^2 \cdot \text{s}^{-2} \cdot \text{K}^{-1}) \times (298.15 \text{ K})} \\ &= \frac{(4.31 \times 10^{-4}) \times (6.28 \times 10^{-9})^3}{(1.38 \times 10^{-23}) \times (298.15)} \text{ s} = 2.59 \times 10^{-8} \text{ s} \end{aligned}$$

Secondly, according to the equation (1):

$$\tau_Z \approx \frac{R^2}{D_z} \approx \frac{\eta_s}{kT} R^3 = \frac{\eta_s b^3}{kT} N^{3\nu} \approx \tau_0 N^{3\nu} \quad (1)$$

Here,  $\tau_0 = 2.43 \times 10^{-8}$  s, toluene is the  $\theta$  solvent of PFO at 25 °C, so,  $\nu = 0.5$  can be obtained, and  $N = 45$  is obtained from equation (9) in the main text. Thus, the polymer chain relaxation time ( $\tau_Z$ ) in the Dilute solution is calculated as follows:

$$\tau_Z = (2.59 \times 10^{-8} \text{ s}) \times (44)^{3 \times 0.5} = 7.56 \times 10^{-6} \text{ s}$$

Finally, according to the equation (2):

$$\tau_R \approx \frac{R^2}{D_R} \approx \frac{\zeta}{kT} NR^2 \approx \frac{\eta_s b^3}{kT} N^{1+2\nu} \approx \tau_0 N^{1+2\nu} \quad (2)$$

Thus, the polymer chain relaxation time ( $\tau_Z$ ) in the Dilute solution is calculated as follows:

$$\tau_R = (2.59 \times 10^{-8} \text{ s}) \times (44)^{1+2 \times 0.5} = 5.01 \times 10^{-5} \text{ s}$$

### 1.3 GPC experiments

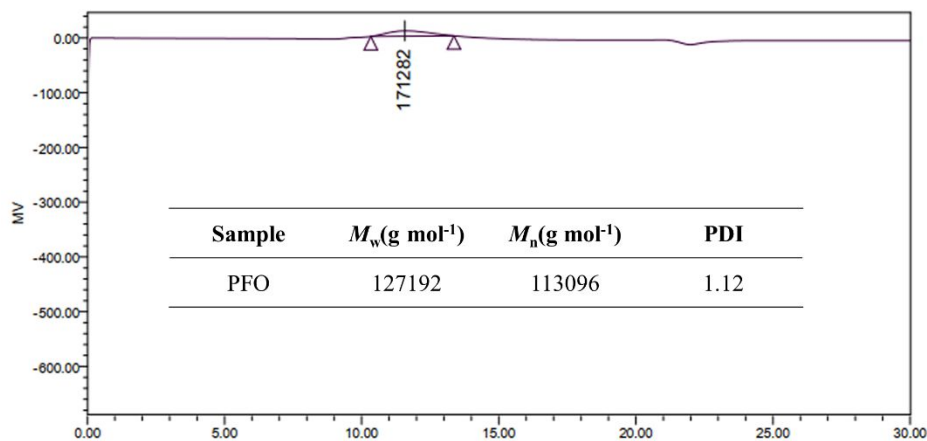

**Figure S1.** Gel permeation chromatography (GPC) curve, the weight-average molecular weight ( $M_w$ ), number-average molecular weight ( $M_n$ ) and the polydispersity index (PDI) of PFO were shown.

### 1.4 LS experiments

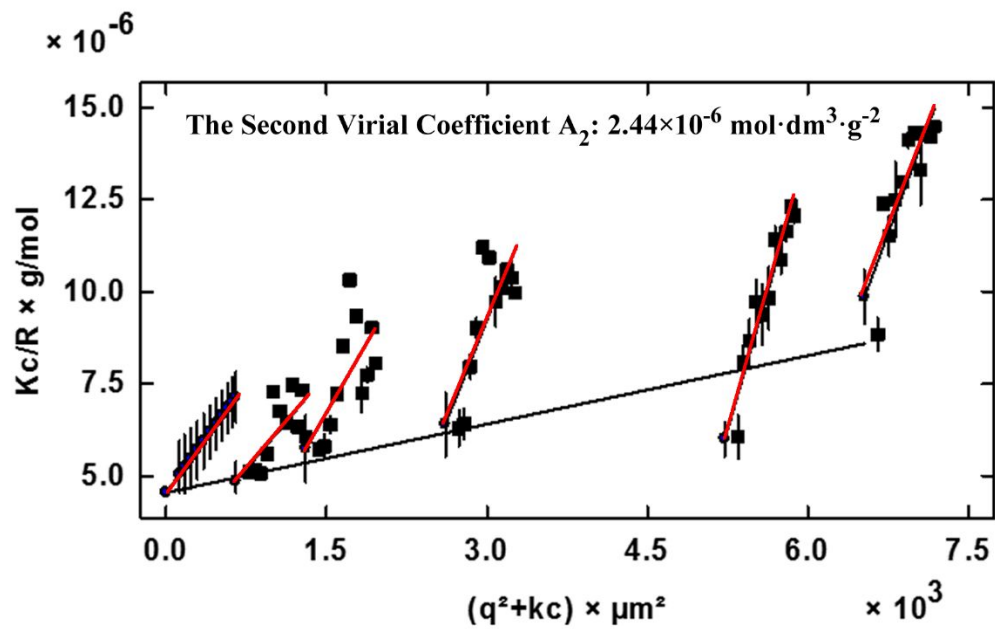

Figure S2 Zimm plots of PFO/toluene dilute solutions at 25 °C.
